# Supplementary material
Source: publisher figshare collection journal article supplement (https://acs.figshare.com/ndownloader/files/3964153)
Supplement: Supplementary file 1 [file 3964153]

data_Compound1
 
_audit_creation_method            SHELXL-97
_chemical_name_systematic
;
 ?
;
_chemical_name_common             ?
_chemical_melting_point           ?
_chemical_formula_moiety          ?
_chemical_formula_sum
 'C14 H8 Cu N2 O8'
_chemical_formula_weight          395.77
 
loop_
 _atom_type_symbol
 _atom_type_description
 _atom_type_scat_dispersion_real
 _atom_type_scat_dispersion_imag
 _atom_type_scat_source
 'C'  'C'   0.0033   0.0016
 'International Tables Vol C Tables 4.2.6.8 and 6.1.1.4'
 'H'  'H'   0.0000   0.0000
 'International Tables Vol C Tables 4.2.6.8 and 6.1.1.4'
 'N'  'N'   0.0061   0.0033
 'International Tables Vol C Tables 4.2.6.8 and 6.1.1.4'
 'O'  'O'   0.0106   0.0060
 'International Tables Vol C Tables 4.2.6.8 and 6.1.1.4'
 'Cu'  'Cu'   0.3201   1.2651
 'International Tables Vol C Tables 4.2.6.8 and 6.1.1.4'
 
_symmetry_cell_setting            'Monoclinic'
_symmetry_space_group_name_H-M    'P2(1)/c  '
 
loop_
 _symmetry_equiv_pos_as_xyz
 'x, y, z'
 '-x, y+1/2, -z+1/2'
 '-x, -y, -z'
 'x, -y-1/2, z-1/2'
 
_cell_length_a                    12.460(5)
_cell_length_b                    9.968(5)
_cell_length_c                    14.021(5)
_cell_angle_alpha                 90.000(5)
_cell_angle_beta                  114.069(5)
_cell_angle_gamma                 90.000(5)
_cell_volume                      1590.0(12)
_cell_formula_units_Z             2
_cell_measurement_temperature     293(2)
_cell_measurement_reflns_used     ?
_cell_measurement_theta_min       ?
_cell_measurement_theta_max       ?
 
_exptl_crystal_description        block
_exptl_crystal_colour             blue
_exptl_crystal_size_max           0.15
_exptl_crystal_size_mid           0.11
_exptl_crystal_size_min           0.07
_exptl_crystal_density_meas       ?
_exptl_crystal_density_diffrn     0.827
_exptl_crystal_density_method     'not measured'
_exptl_crystal_F_000              398
_exptl_absorpt_coefficient_mu     0.710
_exptl_absorpt_correction_type    'empirical'
_exptl_absorpt_correction_T_min   0.530992
_exptl_absorpt_correction_T_max   1
_exptl_absorpt_process_details    ?
 
_exptl_special_details
;
 ?
;
 
_diffrn_ambient_temperature       293(2)
_diffrn_radiation_wavelength      0.71069
_diffrn_radiation_type            MoK\a
_diffrn_radiation_source          'fine-focus sealed tube'
_diffrn_radiation_monochromator   graphite
_diffrn_measurement_device_type   ?
_diffrn_measurement_method        ?
_diffrn_detector_area_resol_mean  ?
_diffrn_standards_number          ?
_diffrn_standards_interval_count  ?
_diffrn_standards_interval_time   ?
_diffrn_standards_decay_%         ?
_diffrn_reflns_number             7981
_diffrn_reflns_av_R_equivalents   0.0503
_diffrn_reflns_av_sigmaI/netI     0.0577
_diffrn_reflns_limit_h_min        -14
_diffrn_reflns_limit_h_max        10
_diffrn_reflns_limit_k_min        -11
_diffrn_reflns_limit_k_max        11
_diffrn_reflns_limit_l_min        -14
_diffrn_reflns_limit_l_max        16
_diffrn_reflns_theta_min          4.09
_diffrn_reflns_theta_max          25.02
_reflns_number_total              2758
_reflns_number_gt                 2042
_reflns_threshold_expression      >2sigma(I)
 
_computing_data_collection        'Bruker SMART'
_computing_cell_refinement        'Bruker SMART'
_computing_data_reduction         'Bruker SAINT'
_computing_structure_solution     'SHELXS-97 (Sheldrick, 1990)'
_computing_structure_refinement   'SHELXL-97 (Sheldrick, 1997)'
_computing_molecular_graphics     'Bruker SHELXTL'
_computing_publication_material   'Bruker SHELXTL'
 
_refine_special_details
;
 Refinement of F^2^ against ALL reflections.  The weighted R-factor wR and
 goodness of fit S are based on F^2^, conventional R-factors R are based
 on F, with F set to zero for negative F^2^. The threshold expression of
 F^2^ > 2sigma(F^2^) is used only for calculating R-factors(gt) etc. and is
 not relevant to the choice of reflections for refinement.  R-factors based
 on F^2^ are statistically about twice as large as those based on F, and R-
 factors based on ALL data will be even larger.
;
 
_refine_ls_structure_factor_coef  Fsqd
_refine_ls_matrix_type            full
_refine_ls_weighting_scheme       calc
_refine_ls_weighting_details
 'calc w=1/[\s^2^(Fo^2^)+(0.1568P)^2^+0.0000P] where P=(Fo^2^+2Fc^2^)/3'
_atom_sites_solution_primary      direct
_atom_sites_solution_secondary    difmap
_atom_sites_solution_hydrogens    geom
_refine_ls_hydrogen_treatment     mixed
_refine_ls_extinction_method      none
_refine_ls_extinction_coef        ?
_refine_ls_number_reflns          2758
_refine_ls_number_parameters      109
_refine_ls_number_restraints      54
_refine_ls_R_factor_all           0.0853
_refine_ls_R_factor_gt            0.0722
_refine_ls_wR_factor_ref          0.2445
_refine_ls_wR_factor_gt           0.2320
_refine_ls_goodness_of_fit_ref    1.151
_refine_ls_restrained_S_all       1.148
_refine_ls_shift/su_max           0.000
_refine_ls_shift/su_mean          0.000
 
loop_
 _atom_site_label
 _atom_site_type_symbol
 _atom_site_fract_x
 _atom_site_fract_y
 _atom_site_fract_z
 _atom_site_U_iso_or_equiv
 _atom_site_adp_type
 _atom_site_occupancy
 _atom_site_symmetry_multiplicity
 _atom_site_calc_flag
 _atom_site_refinement_flags
 _atom_site_disorder_assembly
 _atom_site_disorder_group
Cu1 Cu 0.5000 1.0000 0.5000 0.0221(3) Uani 1 2 d S . .
O1 O 0.3396(3) 0.9410(3) 0.4709(2) 0.0257(7) Uani 1 1 d U . .
O2 O 0.1992(3) 0.8070(4) 0.3663(3) 0.0413(7) Uani 1 1 d . . .
O3 O 0.5722(3) 0.7057(4) 0.1054(3) 0.0413(7) Uani 1 1 d U A .
N1 N 0.4737(3) 0.8974(4) 0.3713(3) 0.0250(8) Uani 1 1 d U . .
C1 C 0.2947(4) 0.8640(5) 0.3954(4) 0.0312(11) Uani 1 1 d U . .
C2 C 0.3685(4) 0.8355(5) 0.3337(4) 0.0294(11) Uani 1 1 d U . .
C3 C 0.3335(4) 0.7537(5) 0.2474(4) 0.0332(11) Uani 1 1 d . . .
H3 H 0.2610 0.7108 0.2238 0.040 Uiso 1 1 calc R . .
C4 C 0.4057(4) 0.7353(5) 0.1962(4) 0.0316(11) Uani 1 1 d U . .
H4A H 0.3815 0.6820 0.1366 0.038 Uiso 1 1 calc R . .
C5 C 0.5165(4) 0.7977(5) 0.2346(4) 0.0342(11) Uani 1 1 d U A .
C6 C 0.5452(4) 0.8785(5) 0.3218(4) 0.0285(10) Uani 1 1 d U . .
H6 H 0.6175 0.9220 0.3475 0.034 Uiso 1 1 calc R . .
C7 C 0.5995(5) 0.7825(6) 0.1804(5) 0.0450(14) Uani 1 1 d U . .
O4A O 0.6836(5) 0.8813(7) 0.2043(5) 0.0285(14) Uiso 0.53 1 d P A 1
H4A1 H 0.7254 0.8672 0.1728 0.043 Uiso 0.53 1 calc PR A 1
O4 O 0.6996(7) 0.8187(9) 0.2302(6) 0.0363(18) Uiso 0.47 1 d P A 2
H4 H 0.7407 0.7534 0.2575 0.054 Uiso 0.47 1 calc PR A 2
 
loop_
 _atom_site_aniso_label
 _atom_site_aniso_U_11
 _atom_site_aniso_U_22
 _atom_site_aniso_U_33
 _atom_site_aniso_U_23
 _atom_site_aniso_U_13
 _atom_site_aniso_U_12
Cu1 0.0221(5) 0.0319(5) 0.0156(5) -0.0039(3) 0.0110(3) -0.0013(3)
O1 0.0263(10) 0.0266(10) 0.0244(10) -0.0005(8) 0.0107(8) 0.0001(8)
O2 0.0410(15) 0.0499(16) 0.0404(15) -0.0171(12) 0.0242(12) -0.0114(12)
O3 0.0410(15) 0.0499(16) 0.0404(15) -0.0171(12) 0.0242(12) -0.0114(12)
N1 0.0255(11) 0.0257(11) 0.0239(11) 0.0000(8) 0.0101(8) 0.0002(8)
C1 0.0308(13) 0.0316(13) 0.0311(13) -0.0007(9) 0.0126(9) -0.0001(9)
C2 0.0298(13) 0.0303(13) 0.0294(13) -0.0004(9) 0.0134(9) -0.0003(9)
C3 0.033(3) 0.036(3) 0.028(2) -0.010(2) 0.009(2) -0.004(2)
C4 0.0317(14) 0.0328(14) 0.0316(14) -0.0018(9) 0.0143(9) 0.0004(9)
C5 0.0338(14) 0.0346(14) 0.0332(14) -0.0014(9) 0.0127(9) 0.0005(9)
C6 0.0285(13) 0.0302(13) 0.0280(13) -0.0016(9) 0.0126(9) 0.0006(9)
C7 0.0446(16) 0.0462(16) 0.0443(16) -0.0031(9) 0.0182(10) 0.0005(9)
 
_geom_special_details
;
 All esds (except the esd in the dihedral angle between two l.s. planes)
 are estimated using the full covariance matrix.  The cell esds are taken
 into account individually in the estimation of esds in distances, angles
 and torsion angles; correlations between esds in cell parameters are only
 used when they are defined by crystal symmetry.  An approximate (isotropic)
 treatment of cell esds is used for estimating esds involving l.s. planes.
;
 
loop_
 _geom_bond_atom_site_label_1
 _geom_bond_atom_site_label_2
 _geom_bond_distance
 _geom_bond_site_symmetry_2
 _geom_bond_publ_flag
Cu1 O1 1.960(3) . ?
Cu1 O1 1.960(3) 3_676 ?
Cu1 N1 1.981(4) . ?
Cu1 N1 1.981(4) 3_676 ?
O1 C1 1.241(6) . ?
O2 C1 1.229(6) . ?
O3 C7 1.231(7) . ?
N1 C2 1.347(6) . ?
N1 C6 1.348(6) . ?
C1 C2 1.524(7) . ?
C2 C3 1.374(6) . ?
C3 C4 1.373(7) . ?
C4 C5 1.405(7) . ?
C5 C6 1.384(7) . ?
C5 C7 1.521(8) . ?
C7 O4 1.210(9) . ?
C7 O4A 1.377(8) . ?
 
loop_
 _geom_angle_atom_site_label_1
 _geom_angle_atom_site_label_2
 _geom_angle_atom_site_label_3
 _geom_angle
 _geom_angle_site_symmetry_1
 _geom_angle_site_symmetry_3
 _geom_angle_publ_flag
O1 Cu1 O1 180.0 . 3_676 ?
O1 Cu1 N1 83.10(14) . . ?
O1 Cu1 N1 96.90(14) 3_676 . ?
O1 Cu1 N1 96.90(14) . 3_676 ?
O1 Cu1 N1 83.10(14) 3_676 3_676 ?
N1 Cu1 N1 179.998(2) . 3_676 ?
C1 O1 Cu1 115.4(3) . . ?
C2 N1 C6 118.5(4) . . ?
C2 N1 Cu1 111.5(3) . . ?
C6 N1 Cu1 130.0(3) . . ?
O2 C1 O1 127.4(4) . . ?
O2 C1 C2 116.9(4) . . ?
O1 C1 C2 115.7(4) . . ?
N1 C2 C3 121.7(4) . . ?
N1 C2 C1 114.1(4) . . ?
C3 C2 C1 124.2(4) . . ?
C4 C3 C2 120.0(5) . . ?
C3 C4 C5 119.4(4) . . ?
C6 C5 C4 117.2(5) . . ?
C6 C5 C7 121.1(5) . . ?
C4 C5 C7 121.7(4) . . ?
N1 C6 C5 123.3(4) . . ?
O4 C7 O3 122.7(6) . . ?
O4 C7 O4A 31.0(4) . . ?
O3 C7 O4A 124.8(5) . . ?
O4 C7 C5 115.6(6) . . ?
O3 C7 C5 118.8(5) . . ?
O4A C7 C5 114.3(5) . . ?
 
_diffrn_measured_fraction_theta_max    0.984
_diffrn_reflns_theta_full              25.02
_diffrn_measured_fraction_theta_full   0.984
_refine_diff_density_max    2.109
_refine_diff_density_min   -0.630
_refine_diff_density_rms    0.121
loop_
  _platon_squeeze_void_nr
  _platon_squeeze_void_average_x
  _platon_squeeze_void_average_y
  _platon_squeeze_void_average_z
  _platon_squeeze_void_volume
  _platon_squeeze_void_count_electrons
  _platon_squeeze_void_content
   1 -0.002 -0.037 -0.003       960       681 ' '
_platon_squeeze_details
;
;
 
#=== end

data_Compound2
 
_audit_creation_method            SHELXL-97
_chemical_name_systematic
;
 ?
;
_chemical_name_common             ?
_chemical_melting_point           ?
_chemical_formula_moiety          'C20 H24 Cu N2 O8 Sn2'
_chemical_formula_sum
 'C20 H24 Cu N2 O8 Sn2'
_chemical_formula_weight          721.33
 
loop_
 _atom_type_symbol
 _atom_type_description
 _atom_type_scat_dispersion_real
 _atom_type_scat_dispersion_imag
 _atom_type_scat_source
 'C'  'C'   0.0033   0.0016
 'International Tables Vol C Tables 4.2.6.8 and 6.1.1.4'
 'H'  'H'   0.0000   0.0000
 'International Tables Vol C Tables 4.2.6.8 and 6.1.1.4'
 'N'  'N'   0.0061   0.0033
 'International Tables Vol C Tables 4.2.6.8 and 6.1.1.4'
 'O'  'O'   0.0106   0.0060
 'International Tables Vol C Tables 4.2.6.8 and 6.1.1.4'
 'Cu'  'Cu'   0.3201   1.2651
 'International Tables Vol C Tables 4.2.6.8 and 6.1.1.4'
 'Sn'  'Sn'  -0.6537   1.4246
 'International Tables Vol C Tables 4.2.6.8 and 6.1.1.4'
 
_symmetry_cell_setting            'Monoclinic'
_symmetry_space_group_name_H-M    'P2(1)/n  '
 
loop_
 _symmetry_equiv_pos_as_xyz
 'x, y, z'
 '-x+1/2, y+1/2, -z+1/2'
 '-x, -y, -z'
 'x-1/2, -y-1/2, z-1/2'
 
_cell_length_a                    10.901(5)
_cell_length_b                    10.346(5)
_cell_length_c                    11.834(5)
_cell_angle_alpha                 90.000(5)
_cell_angle_beta                  107.066(5)
_cell_angle_gamma                 90.000(5)
_cell_volume                      1275.9(10)
_cell_formula_units_Z             2
_cell_measurement_temperature     293(2)
_cell_measurement_reflns_used     ?
_cell_measurement_theta_min       ?
_cell_measurement_theta_max       ?
 
_exptl_crystal_description        block
_exptl_crystal_colour             blue
_exptl_crystal_size_max           0.22
_exptl_crystal_size_mid           0.18
_exptl_crystal_size_min           0.15
_exptl_crystal_density_meas       ?
_exptl_crystal_density_diffrn     1.878
_exptl_crystal_density_method     'not measured'
_exptl_crystal_F_000              702
_exptl_absorpt_coefficient_mu     2.813
_exptl_absorpt_correction_type    'empirical'
_exptl_absorpt_correction_T_min   0.816417
_exptl_absorpt_correction_T_max   1
_exptl_absorpt_process_details    ?
 
_exptl_special_details
;
 ?
;
 
_diffrn_ambient_temperature       293(2)
_diffrn_radiation_wavelength      0.71069
_diffrn_radiation_type            MoK\a
_diffrn_radiation_source          'fine-focus sealed tube'
_diffrn_radiation_monochromator   graphite
_diffrn_measurement_device_type   ?
_diffrn_measurement_method        ?
_diffrn_detector_area_resol_mean  ?
_diffrn_standards_number          ?
_diffrn_standards_interval_count  ?
_diffrn_standards_interval_time   ?
_diffrn_standards_decay_%         ?
_diffrn_reflns_number             6695
_diffrn_reflns_av_R_equivalents   0.0275
_diffrn_reflns_av_sigmaI/netI     0.0327
_diffrn_reflns_limit_h_min        -13
_diffrn_reflns_limit_h_max        12
_diffrn_reflns_limit_k_min        -12
_diffrn_reflns_limit_k_max        9
_diffrn_reflns_limit_l_min        -11
_diffrn_reflns_limit_l_max        14
_diffrn_reflns_theta_min          2.23
_diffrn_reflns_theta_max          25.50
_reflns_number_total              2358
_reflns_number_gt                 2072
_reflns_threshold_expression      >2sigma(I)
 
_computing_data_collection        'Bruker SMART'
_computing_cell_refinement        'Bruker SMART'
_computing_data_reduction         'Bruker SAINT'
_computing_structure_solution     'SHELXS-97 (Sheldrick, 1990)'
_computing_structure_refinement   'SHELXL-97 (Sheldrick, 1997)'
_computing_molecular_graphics     'Bruker SHELXTL'
_computing_publication_material   'Bruker SHELXTL'
 
_refine_special_details
;
 Refinement of F^2^ against ALL reflections.  The weighted R-factor wR and
 goodness of fit S are based on F^2^, conventional R-factors R are based
 on F, with F set to zero for negative F^2^. The threshold expression of
 F^2^ > 2sigma(F^2^) is used only for calculating R-factors(gt) etc. and is
 not relevant to the choice of reflections for refinement.  R-factors based
 on F^2^ are statistically about twice as large as those based on F, and R-
 factors based on ALL data will be even larger.
;
 
_refine_ls_structure_factor_coef  Fsqd
_refine_ls_matrix_type            full
_refine_ls_weighting_scheme       calc
_refine_ls_weighting_details
 'calc w=1/[\s^2^(Fo^2^)+(0.0468P)^2^+2.3682P] where P=(Fo^2^+2Fc^2^)/3'
_atom_sites_solution_primary      direct
_atom_sites_solution_secondary    difmap
_atom_sites_solution_hydrogens    geom
_refine_ls_hydrogen_treatment     mixed
_refine_ls_extinction_method      none
_refine_ls_extinction_coef        ?
_refine_ls_number_reflns          2358
_refine_ls_number_parameters      154
_refine_ls_number_restraints      0
_refine_ls_R_factor_all           0.0368
_refine_ls_R_factor_gt            0.0309
_refine_ls_wR_factor_ref          0.0895
_refine_ls_wR_factor_gt           0.0749
_refine_ls_goodness_of_fit_ref    1.094
_refine_ls_restrained_S_all       1.094
_refine_ls_shift/su_max           0.000
_refine_ls_shift/su_mean          0.000
 
loop_
 _atom_site_label
 _atom_site_type_symbol
 _atom_site_fract_x
 _atom_site_fract_y
 _atom_site_fract_z
 _atom_site_U_iso_or_equiv
 _atom_site_adp_type
 _atom_site_occupancy
 _atom_site_symmetry_multiplicity
 _atom_site_calc_flag
 _atom_site_refinement_flags
 _atom_site_disorder_assembly
 _atom_site_disorder_group
Sn1 Sn 0.23743(3) 0.84753(3) 0.65280(3) 0.01685(13) Uani 1 1 d . . .
Cu1 Cu 0.0000 1.0000 0.0000 0.01601(19) Uani 1 2 d S . .
O1 O 0.0760(3) 0.9388(3) -0.1191(2) 0.0150(6) Uani 1 1 d . . .
O2 O 0.2352(3) 0.8733(3) 0.4695(3) 0.0208(7) Uani 1 1 d . . .
O3 O 0.3654(3) 0.7040(3) 0.4731(3) 0.0229(7) Uani 1 1 d . . .
O4 O 0.2377(3) 0.8171(3) 0.8589(3) 0.0217(7) Uani 1 1 d . . .
N1 N 0.1424(3) 0.9026(3) 0.1096(3) 0.0130(7) Uani 1 1 d . . .
C1 C 0.1738(4) 0.8662(4) -0.0804(4) 0.0151(9) Uani 1 1 d . . .
C2 C 0.2936(4) 0.7909(4) 0.4214(4) 0.0167(9) Uani 1 1 d . . .
C3 C 0.2136(5) 0.8405(4) 0.0513(4) 0.0178(10) Uani 1 1 d . . .
C4 C 0.3130(4) 0.7602(4) 0.1085(4) 0.0198(10) Uani 1 1 d . . .
H4 H 0.3611 0.7180 0.0666 0.024 Uiso 1 1 calc R . .
C5 C 0.3401(4) 0.7434(4) 0.2287(4) 0.0208(10) Uani 1 1 d . . .
H5 H 0.4063 0.6885 0.2686 0.025 Uiso 1 1 calc R . .
C6 C 0.2689(4) 0.8082(4) 0.2901(4) 0.0161(9) Uani 1 1 d . . .
C7 C 0.1685(4) 0.8882(4) 0.2252(4) 0.0151(9) Uani 1 1 d . . .
H7 H 0.1191 0.9323 0.2648 0.018 Uiso 1 1 calc R . .
C8 C 0.4398(4) 0.8580(5) 0.7297(4) 0.0222(10) Uani 1 1 d . . .
H8A H 0.4802 0.8727 0.6689 0.033 Uiso 1 1 calc R . .
H8B H 0.4704 0.7782 0.7694 0.033 Uiso 1 1 calc R . .
H8C H 0.4601 0.9278 0.7856 0.033 Uiso 1 1 calc R . .
C9 C 0.1376(5) 0.6688(4) 0.6137(4) 0.0220(10) Uani 1 1 d . . .
H9A H 0.1065 0.6444 0.6786 0.033 Uiso 1 1 calc R . .
H9B H 0.1946 0.6034 0.6012 0.033 Uiso 1 1 calc R . .
H9C H 0.0664 0.6781 0.5436 0.033 Uiso 1 1 calc R . .
C10 C 0.1272(5) 1.0187(4) 0.6406(4) 0.0223(10) Uani 1 1 d . . .
H10A H 0.0385 0.9996 0.6024 0.033 Uiso 1 1 calc R . .
H10B H 0.1566 1.0821 0.5953 0.033 Uiso 1 1 calc R . .
H10C H 0.1366 1.0517 0.7184 0.033 Uiso 1 1 calc R . .
 
loop_
 _atom_site_aniso_label
 _atom_site_aniso_U_11
 _atom_site_aniso_U_22
 _atom_site_aniso_U_33
 _atom_site_aniso_U_23
 _atom_site_aniso_U_13
 _atom_site_aniso_U_12
Sn1 0.0207(2) 0.0186(2) 0.01123(19) 0.00069(11) 0.00461(13) 0.00390(11)
Cu1 0.0158(4) 0.0226(4) 0.0093(4) 0.0014(3) 0.0032(3) 0.0051(3)
O1 0.0168(15) 0.0176(15) 0.0105(15) 0.0007(12) 0.0040(12) 0.0006(12)
O2 0.0257(17) 0.0243(16) 0.0124(16) 0.0011(13) 0.0055(14) 0.0082(13)
O3 0.0279(18) 0.0251(17) 0.0153(16) 0.0063(14) 0.0057(14) 0.0079(14)
O4 0.0275(17) 0.0236(16) 0.0134(17) 0.0014(13) 0.0050(14) 0.0088(14)
N1 0.0146(17) 0.0139(17) 0.0108(18) -0.0015(14) 0.0042(14) 0.0007(14)
C1 0.022(2) 0.014(2) 0.011(2) -0.0036(16) 0.0053(18) -0.0007(17)
C2 0.017(2) 0.021(2) 0.012(2) -0.0002(18) 0.0040(18) -0.0007(18)
C3 0.023(2) 0.015(2) 0.011(2) 0.0004(16) -0.0008(19) -0.0008(17)
C4 0.025(2) 0.019(2) 0.016(2) 0.0005(18) 0.0084(19) 0.0074(18)
C5 0.023(2) 0.018(2) 0.018(2) -0.0010(18) -0.0003(19) 0.0053(18)
C6 0.018(2) 0.017(2) 0.013(2) 0.0005(18) 0.0047(17) 0.0011(18)
C7 0.016(2) 0.016(2) 0.013(2) -0.0013(17) 0.0055(17) 0.0037(17)
C8 0.021(2) 0.029(3) 0.018(2) -0.0018(19) 0.009(2) 0.0005(19)
C9 0.027(2) 0.020(2) 0.021(2) 0.0008(18) 0.010(2) -0.0007(19)
C10 0.028(3) 0.021(2) 0.017(2) 0.0003(18) 0.004(2) 0.0094(19)
 
_geom_special_details
;
 All esds (except the esd in the dihedral angle between two l.s. planes)
 are estimated using the full covariance matrix.  The cell esds are taken
 into account individually in the estimation of esds in distances, angles
 and torsion angles; correlations between esds in cell parameters are only
 used when they are defined by crystal symmetry.  An approximate (isotropic)
 treatment of cell esds is used for estimating esds involving l.s. planes.
;
 
loop_
 _geom_bond_atom_site_label_1
 _geom_bond_atom_site_label_2
 _geom_bond_distance
 _geom_bond_site_symmetry_2
 _geom_bond_publ_flag
Sn1 C10 2.121(4) . ?
Sn1 C9 2.126(5) . ?
Sn1 C8 2.128(5) . ?
Sn1 O2 2.178(3) . ?
Sn1 O4 2.459(3) . ?
Cu1 O1 1.938(3) . ?
Cu1 O1 1.939(3) 3_575 ?
Cu1 N1 1.981(3) . ?
Cu1 N1 1.981(3) 3_575 ?
O1 C1 1.274(5) . ?
O2 C2 1.293(5) . ?
O3 C2 1.230(5) . ?
O4 C1 1.246(5) 1_556 ?
N1 C7 1.320(6) . ?
N1 C3 1.343(6) . ?
C1 O4 1.246(5) 1_554 ?
C1 C3 1.514(6) . ?
C2 C6 1.509(6) . ?
C3 C4 1.376(6) . ?
C4 C5 1.377(6) . ?
C5 C6 1.383(6) . ?
C6 C7 1.407(6) . ?
 
loop_
 _geom_angle_atom_site_label_1
 _geom_angle_atom_site_label_2
 _geom_angle_atom_site_label_3
 _geom_angle
 _geom_angle_site_symmetry_1
 _geom_angle_site_symmetry_3
 _geom_angle_publ_flag
C10 Sn1 C9 117.9(2) . . ?
C10 Sn1 C8 118.83(19) . . ?
C9 Sn1 C8 122.53(18) . . ?
C10 Sn1 O2 89.38(15) . . ?
C9 Sn1 O2 91.98(16) . . ?
C8 Sn1 O2 97.30(16) . . ?
C10 Sn1 O4 90.59(15) . . ?
C9 Sn1 O4 87.47(15) . . ?
C8 Sn1 O4 83.28(15) . . ?
O2 Sn1 O4 179.36(11) . . ?
O1 Cu1 O1 179.999(1) . 3_575 ?
O1 Cu1 N1 83.69(13) . . ?
O1 Cu1 N1 96.31(13) 3_575 . ?
O1 Cu1 N1 96.31(13) . 3_575 ?
O1 Cu1 N1 83.69(13) 3_575 3_575 ?
N1 Cu1 N1 180.00(16) . 3_575 ?
C1 O1 Cu1 115.0(3) . . ?
C2 O2 Sn1 119.6(3) . . ?
C1 O4 Sn1 133.0(3) 1_556 . ?
C7 N1 C3 119.7(4) . . ?
C7 N1 Cu1 128.7(3) . . ?
C3 N1 Cu1 111.5(3) . . ?
O4 C1 O1 125.7(4) 1_554 . ?
O4 C1 C3 118.9(4) 1_554 . ?
O1 C1 C3 115.5(4) . . ?
O3 C2 O2 125.9(4) . . ?
O3 C2 C6 119.7(4) . . ?
O2 C2 C6 114.4(4) . . ?
N1 C3 C4 121.8(4) . . ?
N1 C3 C1 114.3(4) . . ?
C4 C3 C1 123.9(4) . . ?
C3 C4 C5 118.9(4) . . ?
C4 C5 C6 119.9(4) . . ?
C5 C6 C7 117.7(4) . . ?
C5 C6 C2 121.7(4) . . ?
C7 C6 C2 120.5(4) . . ?
N1 C7 C6 121.9(4) . . ?
 
_diffrn_measured_fraction_theta_max    0.992
_diffrn_reflns_theta_full              25.50
_diffrn_measured_fraction_theta_full   0.992
_refine_diff_density_max    1.317
_refine_diff_density_min   -0.587
_refine_diff_density_rms    0.143
